# Supplementary material for: Broadband and warm white emission in Cs2In1−xCl5·H2O:xAg+ phosphors enabled by H3PO2-mediated stabilization
Source: Royal Society of Chemistry journal article supplement (doi:10.1039/d4tc04965a), 2025-01-01
Supplement: d4tc04965a1.pdf [file d4tc04965a1.pdf]

## Supporting Information

### **Broadband and Warm White Emission in $\text{Cs}_2\text{In}_{1-x}\text{Cl}_5 \cdot \text{H}_2\text{O} : x\text{Ag}^+$**

#### **Phosphors Enabled by $\text{H}_3\text{PO}_2$ -Mediated Stabilization**

*Ying Qin*<sup>a</sup>, *Yuexiao Pan*<sup>a,\*</sup>, *Haoshuai Wan*<sup>a</sup>, *Tiantian Zhao*<sup>a</sup>, *Weiyu Xu*<sup>a</sup>, *Qian Miao*<sup>a,\*</sup>, *Jun*

*Zou*<sup>b,c\*</sup>

<sup>a</sup>Key Laboratory of Carbon Materials of Zhejiang Province, College of Chemistry and Materials Engineering, Wenzhou University, Wenzhou 325035, P.R. China.

E-mail: [yxpan@wzu.edu.cn](mailto:yxpan@wzu.edu.cn)

<sup>b</sup>Institute of New Materials & Industrial Technology, Wenzhou University, Wenzhou 325024, China;

<sup>c</sup>School of Science, Shanghai Institute of Technology, Shanghai, 201418, China;

E-mail: [zoujun@sit.edu.cn](mailto:zoujun@sit.edu.cn)

Figure:

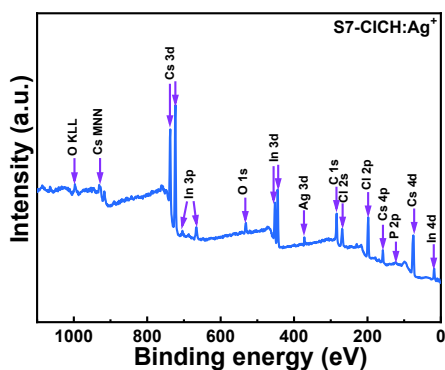

Fig. S1 XPS full spectrum of S7-CICH:Ag<sup>+</sup>.

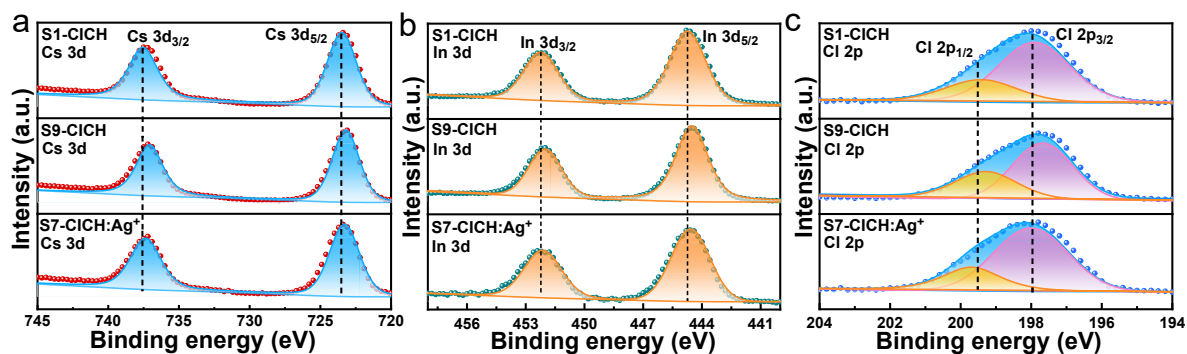

Fig. S2 High-resolution XPS spectra of Cs 3d, In 3d and Cl 2p in S1-CICH, S9-CICH and S7-CICH:Ag<sup>+</sup>.

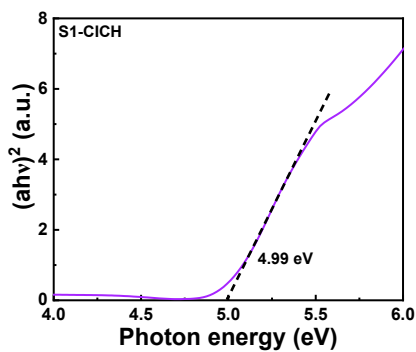

Fig. S3 Tauc-plot of the UV-vis absorption spectrum of S1-CICH.

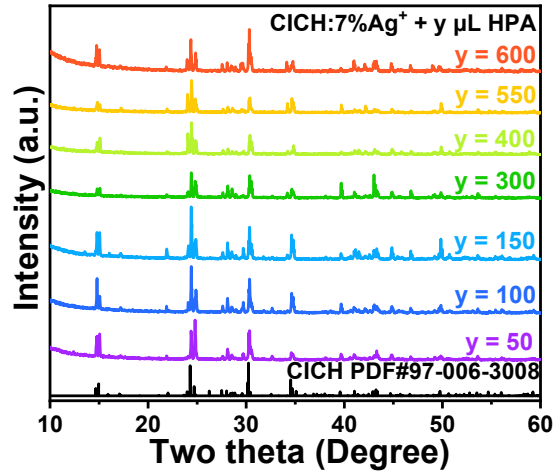

**Fig. S4** XRD patterns of ClCH:7%Ag<sup>+</sup> at different HPA levels.

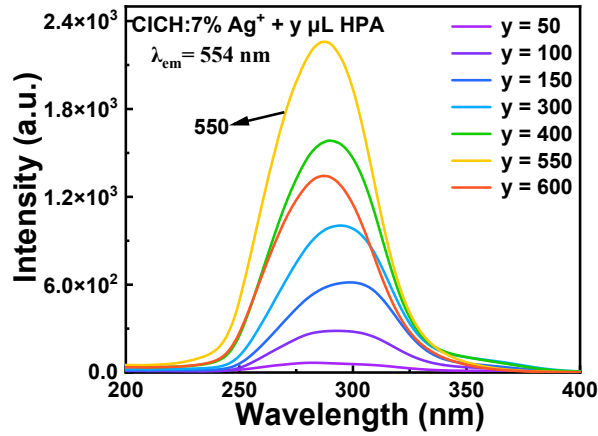

**Fig. S5** PLE spectra of ClCH:7%Ag<sup>+</sup> at different HPA levels under 554 nm emission.

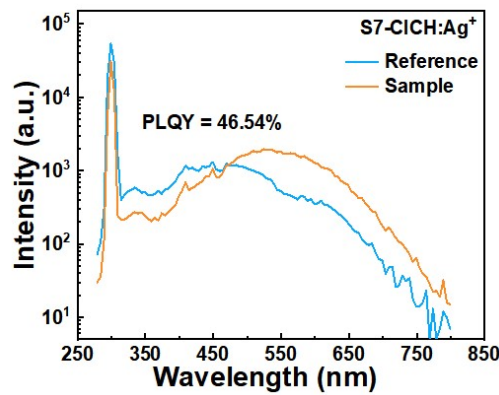

**Fig. S6** PLQY measurement of S7-ClCH:Ag<sup>+</sup> crystals in an integrated sphere with 299 nm excitation source.

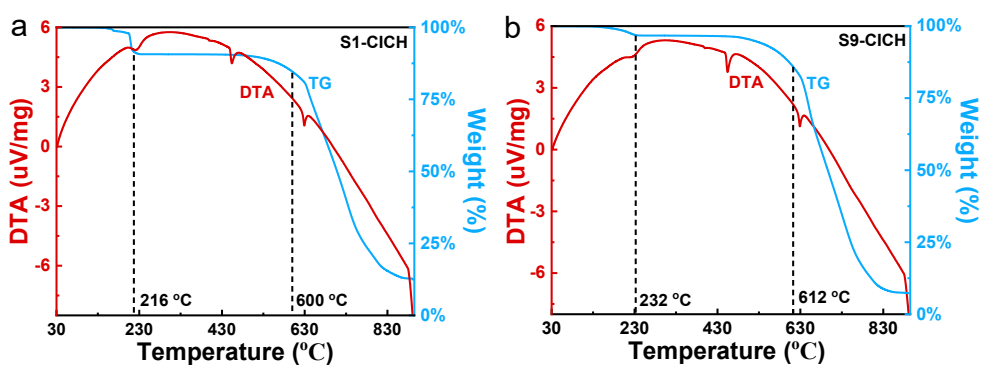

**Fig. S7** TG-DTA curves of (a) S1-CICH and (b) S9 sample.

Table:

**Table. S1** The result ICP-OES measurements for CICH:7%Ag<sup>+</sup> at different mounts of HPA levels

| Volume (μL) | Actual In concentration (mg/mL) | Actual Ag concentration (mg/mL) | Actual Ag to In molar ratio |
|-------------|---------------------------------|---------------------------------|-----------------------------|
| 150         | 197.45                          | 1.16                            | 0.6%                        |
| 400         | 195.69                          | 2.34                            | 1.2%                        |
| 550         | 182.62                          | 5.12                            | 2.8%                        |
| 600         | 179.15                          | 7.31                            | 4.1%                        |
